# Supplementary material
Source: publisher figshare collection journal article supplement (https://sage.figshare.com/ndownloader/files/25876899)
Supplement: Supplementary file 1 [file 25876899]

## Sheet: Data
Supplement Digital Content 3 – First run demographic and pre- extracorporeal membrane oxygenation features of final run survivors and non-survivors by age and support type.
a. Neonate Pulmonary						b. Neonate Cardiac						c. Neonate ECPR
Variable	N Used	Died (N=153)	Discharged Alive (N=84)	P Value		Variable	N Used	Died (N=216)	Discharged Alive (N=59)	P Value		Variable	N Used	Died (N=46)	Discharged Alive (N=22)	P Value
AgeDays	237	1(0, 2)	1(0, 2)	0.32		AgeDays	275	6(3, 10)	7(3, 12)	0.51		AgeDays	68	5(2, 11)	9(2, 13)	0.54
Sex	234			0.16		Sex	272			0.66		Sex	68			0.20
Female		59(38.6%)	39(48.1%)			Female		88(41.1%)	22(37.9%)			Female		20(43.5%)	6(27.3%)
male		94(61.4%)	42(51.9%)			male		126(58.9%)	36(62.1%)			male		26(56.5%)	16(72.7%)
Weight	223	3.08(2.71, 3.42)	3.1(2.82, 3.5)	0.34		Weight	274	3.1(2.7, 3.4)	3.3(3, 3.7)	0.002		Weight	68	3(2.4, 3.5)	3(2.8, 3.2)	0.50
Race	234			0.57		Race	270			0.44		Race	68			0.60
White		99(64.7%)	47(58.0%)			White		136(64.2%)	42(72.4%)			White		25(54.3%)	14(63.6%)
Black		25(16.3%)	17(21.0%)			Black		23(10.8%)	6(10.3%)			Black		5(10.9%)	3(13.6%)
Other		29(19.0%)	17(21.0%)			Other		53(25.0%)	10(17.2%)			Other		16(34.8%)	5(22.7%)
pH	225	7.2(7.08, 7.32)	7.19(7.06, 7.31)	0.38		pH	226	7.27(7.17, 7.35)	7.24(7.14, 7.4)	0.98		pH	62	7.26(7.08, 7.33)	7.07(6.87, 7.26)	0.11
PCO2	226	60.4(43.7, 85)	59.8(46, 78.4)	0.96		PCO2	226	47(38, 57)	46(36, 65)	0.96		PCO2	62	45.7(34, 67)	51(42.5, 100)	0.13
PO2	226	34.5(25, 44)	30.9(23.3, 42)	0.53		PO2	225	41.7(29, 90)	38.7(27.2, 64.5)	0.49		PO2	62	41(27, 55)	43.5(20.5, 60.5)	0.82
HCO3	200	23.8(20, 26)	23(19.8, 26)	0.48		HCO3	209	21(17, 24.8)	21(18, 24)	0.96		HCO3	53	21.1(16.5, 24.1)	19(14.8, 27)	0.72
SaO2	195	61.9(43, 79)	66(36, 76)	0.89		SaO2	199	72(56, 96.1)	65.6(40, 89)	0.15		SaO2	53	72(49, 83)	79.5(56.5, 87)	0.32
FiO2	222	100(100, 100)	100(100, 100)	0.98		FiO2	192	98(50, 100)	100(90, 100)	0.038		FiO2	54	100(35, 100)	100(35, 100)	0.86
Bicarbonate admin	237	41(26.8%)	25(29.8%)	0.63		Bicarbonate admin	275	49(22.7%)	17(28.8%)	0.33		Bicarbonate admin	68	18(39.1%)	7(31.8%)	0.56
Neuromuscular blockade	237	90(58.8%)	43(51.2%)	0.26		Neuromuscular blockade	275	128(59.3%)	40(67.8%)	0.23		Neuromuscular blockade	68	23(50.0%)	12(54.5%)	0.73
Inotrope requirement	237	109(71.2%)	61(72.6%)	0.82		Inotrope requirement	275	154(71.3%)	43(72.9%)	0.81		Inotrope requirement	68	28(60.9%)	14(63.6%)	0.83
Temporary pacemaker use	237	0(0.0%)	1(1.2%)	0.34		Temporary pacemaker use	275	17(7.9%)	5(8.5%)	.99		Temporary pacemaker use	68	2(4.3%)	1(4.5%)	.99
High-frequency oscillator use	237	96(62.7%)	56(66.7%)	0.55		High-frequency oscillator use	275	11(5.1%)	4(6.8%)	0.75		High-frequency oscillator use	68	1(2.2%)	0(0.0%)	.99
Inhaled nitric oxide	237	105(68.6%)	70(83.3%)	0.014		Inhaled nitric oxide	275	60(27.8%)	19(32.2%)	0.51		Inhaled nitric oxide	68	11(23.9%)	2(9.1%)	0.20
Ventilation duration before ECMO(h)	229			0.61		Ventilation duration before ECMO(h)	265			0.097		Ventilation duration before ECMO(h)	65			0.12
<15		64(43.0%)	29(36.3%)			<15		72(34.8%)	29(50.0%)			<15		15(34.1%)	11(52.4%)
15-131		73(49.0%)	44(55.0%)			15-131		96(46.4%)	22(37.9%)			15-131		20(45.5%)	4(19.0%)
>131		12(8.1%)	7(8.8%)			>131		39(18.8%)	7(12.1%)			>131		9(20.5%)	6(28.6%)
d. Pediatric Pulmonary						e. Pediatric Cardiac						f. Pediatric ECPR
Variable	N Used	Died (N=73)	Discharged Alive (N=56)	P Value		Variable	N Used	Died (N=277)	Discharged Alive (N=182)	P Value		Variable	N Used	Died (N=99)	Discharged Alive (N=76)	P Value
AgeDays	129	163(20, 1190)	408(102, 2770)	0.042		AgeDays	459	104(17, 656)	261(53, 1280)	0.0004		AgeDays	175	113(28, 883)	112(37.5, 1050)	0.52
Sex	128			0.89		Sex	454			0.079		Sex	174			0.63
Female		31(42.5%)	24(43.6%)			Female		129(46.9%)	69(38.5%)			Female		50(51.0%)	36(47.4%)
male		42(57.5%)	31(56.4%)			male		146(53.1%)	110(61.5%)			male		48(49.0%)	40(52.6%)
Weight	120	7(3.3, 17)	7.8(4.5, 20)	0.14		Weight	455	4.5(3.26, 10)	8(3.97, 14.6)	<.0001		Weight	175	4.7(3.01, 13.9)	5(3.5, 12.6)	0.29
Race	125			0.049		Race	451			0.047		Race	173			0.72
White		43(60.6%)	42(77.8%)			White		163(59.9%)	112(62.6%)			White		57(58.8%)	49(64.5%)
Black		14(19.7%)	3(5.6%)			Black		40(14.7%)	13(7.3%)			Black		12(12.4%)	9(11.8%)
Other		14(19.7%)	9(16.7%)			Other		69(25.4%)	54(30.2%)			Other		28(28.9%)	18(23.7%)
pH	121	7.25(7.12, 7.36)	7.25(7.13, 7.37)	0.84		pH	375	7.28(7.17, 7.36)	7.29(7.18, 7.37)	0.46		pH	127	7.22(7.04, 7.34)	7.17(7.03, 7.33)	0.41
PCO2	121	58.2(42.5, 79.5)	61(45, 81)	0.64		PCO2	373	48(38, 58)	44.4(38, 55.5)	0.23		PCO2	127	50.5(41, 67)	52(41, 78)	0.67
PO2	121	44.6(30, 64.4)	46(34, 79)	0.31		PO2	372	50.5(36, 115)	75.2(42, 182)	0.005		PO2	127	39.8(29, 71)	47(30, 65)	0.30
HCO3	108	24.7(22, 28.9)	27.4(21, 35)	0.33		HCO3	358	22.4(18, 25)	21(17, 25.4)	0.57		HCO3	117	21(16, 26.2)	21.1(14.1, 24)	0.55
SaO2	111	75.5(59, 88)	79(61.8, 94)	0.29		SaO2	332	81.5(60.3, 97)	94(73, 99)	0.0009		SaO2	115	69(45, 86)	76(37.5, 97)	0.58
FiO2	114	100(100, 100)	100(100, 100)	0.68		FiO2	328	98.5(50, 100)	99(50, 100)	0.64		FiO2	128	100(57.5, 100)	100(100, 100)	0.18
Bicarbonate admin	129	8(11.0%)	5(8.9%)	0.70		Bicarbonate admin	459	56(20.2%)	28(15.4%)	0.19		Bicarbonate admin	175	32(32.3%)	29(38.2%)	0.42
Neuromuscular blockade	129	44(60.3%)	30(53.6%)	0.45		Neuromuscular blockade	459	156(56.3%)	94(51.6%)	0.33		Neuromuscular blockade	175	42(42.4%)	30(39.5%)	0.69
Inotrope requirement	129	49(67.1%)	30(53.6%)	0.12		Inotrope requirement	459	189(68.2%)	120(65.9%)	0.61		Inotrope requirement	175	65(65.7%)	44(57.9%)	0.29
Temporary pacemaker use	129	1(1.4%)	1(1.8%)	.99		Temporary pacemaker use	459	24(8.7%)	8(4.4%)	0.079		Temporary pacemaker use	175	5(5.1%)	5(6.6%)	0.75
High-frequency oscillator use	129	32(43.8%)	18(32.1%)	0.18		High-frequency oscillator use	459	6(2.2%)	4(2.2%)	.99		High-frequency oscillator use	175	3(3.0%)	0(0.0%)	0.26
Inhaled nitric oxide	129	40(54.8%)	31(55.4%)	0.95		Inhaled nitric oxide	459	75(27.1%)	29(15.9%)	0.005		Inhaled nitric oxide	175	10(10.1%)	4(5.3%)	0.24
Ventilation duration before ECMO(h)	118			0.77		Ventilation duration before ECMO(h)	431			0.002		Ventilation duration before ECMO(h)	165			0.33
<15		19(27.9%)	16(32.0%)			<15		104(40.3%)	98(56.6%)			<15		48(52.7%)	47(63.5%)
15-131		26(38.2%)	16(32.0%)			15-131		95(36.8%)	53(30.6%)			15-131		26(28.6%)	18(24.3%)
>131		23(33.8%)	18(36.0%)			>131		59(22.9%)	22(12.7%)			>131		17(18.7%)	9(12.2%)
g. Adult Pulmonary						h. Adult Cardiac						i. Adult ECPR
Variable	N Used	Died (N=94)	Discharged Alive (N=80)	P Value		Variable	N Used	Died (N=167)	Discharged Alive (N=79)	P Value		Variable	N Used	Died (N=39)	Discharged Alive (N=16)	P Value
Age Year	174	48.4(32.0,60.4)	39.9(20.9,49.9)	0.037		Age Year	246	54.6(39.9,62.0)	52.5(38.0,61.6)	0.67		Age Year	55	55.4(45.1,63.2)	57.8(49.2, 65.5)	0.45
Sex	171			0.19		Sex	245			0.87		Sex	53			.99
Female		34(37.0%)	37(46.8%)			Female		66(39.5%)	30(38.5%)			Female		11(28.2%)	4(28.6%)
male		58(63.0%)	42(53.2%)			male		101(60.5%)	48(61.5%)			male		28(71.8%)	10(71.4%)
Weight	168	75(60, 90)	80.9(61, 95)	0.17		Weight	234	77(65, 94)	76(68, 95)	0.66		Weight	50	85(68, 95)	85.5(72.7, 90)	0.80
Race	170			0.34		Race	236			0.68		Race	53			0.64
White		52(57.1%)	50(63.3%)			White		96(60.4%)	50(64.9%)			White		23(59.0%)	9(64.3%)
Black		6(6.6%)	8(10.1%)			Black		15(9.4%)	8(10.4%)			Black		3(7.7%)	2(14.3%)
Other		33(36.3%)	21(26.6%)			Other		48(30.2%)	19(24.7%)			Other		13(33.3%)	3(21.4%)
pH	148	7.28(7.16, 7.39)	7.3(7.2, 7.41)	0.39		pH	163	7.31(7.21, 7.41)	7.24(7.17, 7.36)	0.16		pH	39	7.25(7.1, 7.42)	7.12(7.03, 7.22)	0.065
PCO2	150	55(40, 70)	51(41, 63)	0.41		PCO2	165	37.2(27, 49)	43(32, 60)	0.008		PCO2	40	42(29.6, 60.6)	54(46.2, 62.3)	0.12
PO2	150	64(50, 73)	56(44, 72)	0.092		PO2	165	98.4(63, 206)	74(50, 120)	0.075		PO2	41	64.6(46.5, 140)	51.7(30, 100)	0.47
HCO3	136	24.9(20.5, 32)	24.6(20, 29)	0.48		HCO3	155	20.2(16, 23.9)	20.9(17.8, 24)	0.27		HCO3	39	18.5(16, 22.5)	17(15.3, 19.2)	0.30
SaO2	133	88(82, 93.5)	86(77, 94)	0.50		SaO2	149	97(91, 99)	92.5(84, 97.7)	0.009		SaO2	38	95.8(86, 98.7)	88(52, 100)	0.73
FiO2	138	100(100, 100)	100(100, 100)	0.90		FiO2	136	90(50, 100)	100(60, 100)	0.098		FiO2	32	100(70, 100)	100(100, 100)	0.13
Bicarbonate admin	174	13(13.8%)	8(10.0%)	0.44		Bicarbonate admin	246	22(13.2%)	6(7.6%)	0.20		Bicarbonate admin	55	11(28.2%)	2(12.5%)	0.30
Neuromuscular blockade	174	23(24.5%)	30(37.5%)	0.063		Neuromuscular blockade	246	31(18.6%)	9(11.4%)	0.15		Neuromuscular blockade	55	8(20.5%)	2(12.5%)	0.70
Inotrope requirement	174	43(45.7%)	32(40.0%)	0.45		Inotrope requirement	246	91(54.5%)	41(51.9%)	0.70		Inotrope requirement	55	14(35.9%)	7(43.8%)	0.59
Temporary pacemaker use	174	1(1.1%)	0(0.0%)	.99		Temporary pacemaker use	246	14(8.4%)	2(2.5%)	0.082		Temporary pacemaker use	55	4(10.3%)	0(0.0%)	0.31
High-frequency oscillator use	174	3(3.2%)	2(2.5%)	.99		High-frequency oscillator use	246	1(0.6%)	1(1.3%)	.99		High-frequency oscillator use	55	1(2.6%)	1(6.3%)	.99
Inhaled nitric oxide	174	16(17.0%)	8(10.0%)	0.18		Inhaled nitric oxide	246	15(9.0%)	4(5.1%)	0.28		Inhaled nitric oxide	55	2(5.1%)	2(12.5%)	0.57
Ventilation duration before ECMO(h)	148			0.078		Ventilation duration before ECMO(h)	200			0.32		Ventilation duration before ECMO(h)	46			0.82
<15		17(21.8%)	26(37.1%)			<15		72(52.6%)	37(58.7%)			<15		20(60.6%)	9(69.2%)
15-131		42(53.8%)	34(48.6%)			15-131		61(44.5%)	26(41.3%)			15-131		12(36.4%)	4(30.8%)
>131		19(24.4%)	10(14.3%)			>131		4(2.9%)	0(0.0%)			>131		1(3.0%)	0(0.0%)
Values are N(%), Median(Q1,Q3) .
